# Supplementary material for: Myelinating Co-Culture as a Model to Study Anti-NMDAR Neurotoxicity
Source: MDPI journal article supplement (doi:10.3390/ijms24010248), 2022-12-23

# Myelinating co-cultures as a model to study anti-NMDAR neurotoxicity.

Mercedeh Farhat Sabet<sup>1</sup>, Sumanta Barman<sup>1</sup>, Mathias Beller<sup>2</sup>,  
Sven G. Meuth<sup>1</sup>, Nico Melzer<sup>1</sup>, Orhan Aktas<sup>1</sup>, Norbert Goebels<sup>1\*</sup>  
and Tim Prozorovski<sup>1\*</sup>

<sup>1</sup>Department of Neurology, Medical Faculty, Heinrich-Heine-Universität  
Düsseldorf, Moorenstr. 5, Düsseldorf, 40225, Germany

<sup>2</sup>Institut für Mathematische Modellierung Biologischer Systeme,  
Heinrich-Heine-Universität Düsseldorf, 40225 Düsseldorf, Germany.

\*These authors contributed equally to this work.

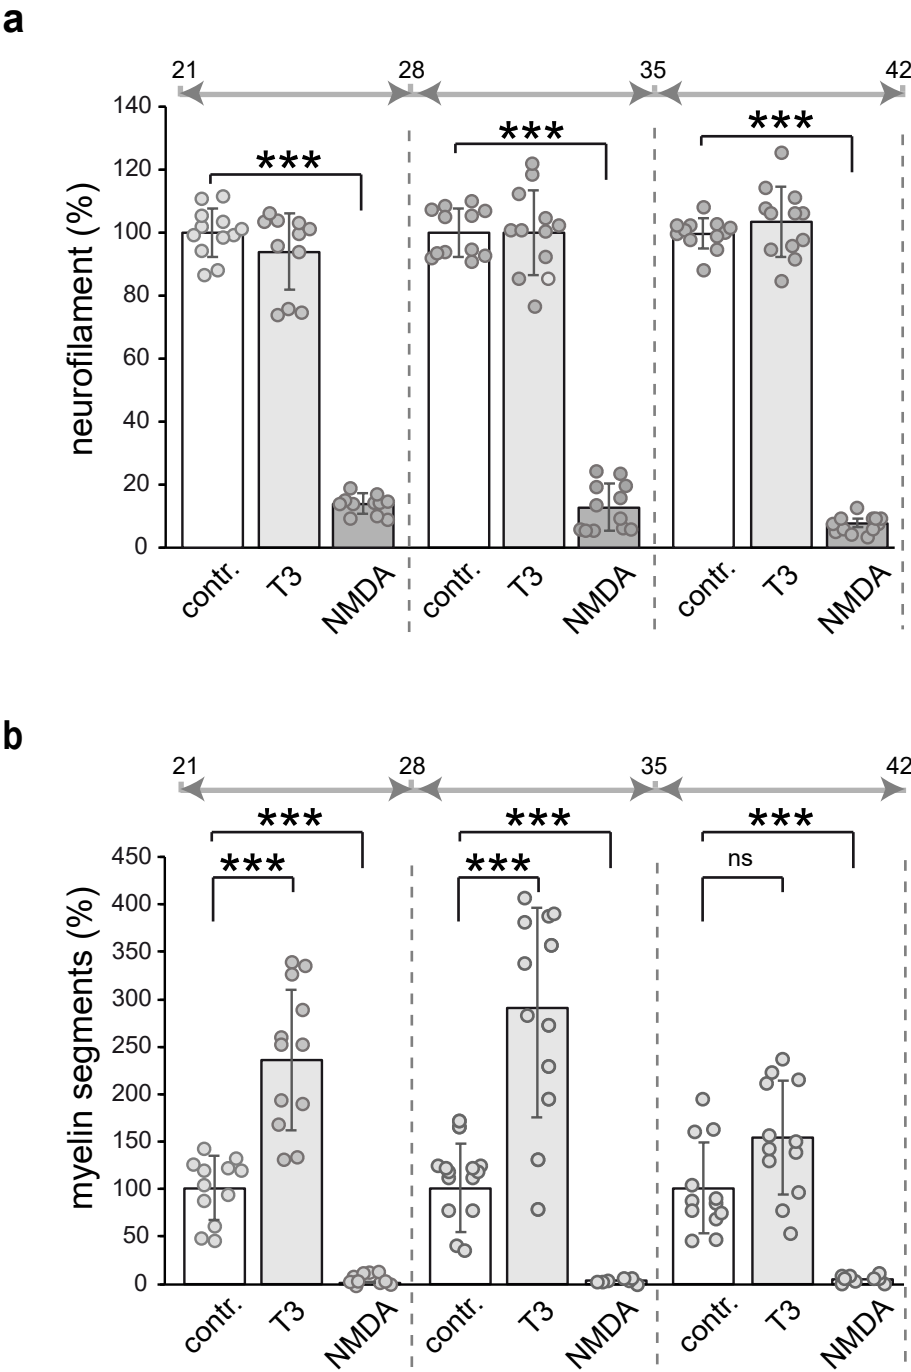

Figure S1. Responses to NMDA and T3 hormone treatment in myelinating spinal cord cultures. Cultures were treated for one week with NMDA (100  $\mu$ M) or T3 (1  $\mu$ M). (a) CellProfiler analysis of neurofilament immunoreactivity (immunostaining for NF200) revealed a drastic decrease of neurite density in the NMDA-treated group. (b) CellProfiler analysis of myelin segments (double immunostaining for NF200 and MBP) depicted increased myelination in T3-treated group and loss of myelination upon NMDA toxicity. One-way ANOVA with Tukey multiple comparison showed significant differences between T3 and NMDA vs control groups. Mean  $\pm$  SEM, (n = 3; technical replicates = 4); ns, non-significant; \*\*\* p < 0.001.

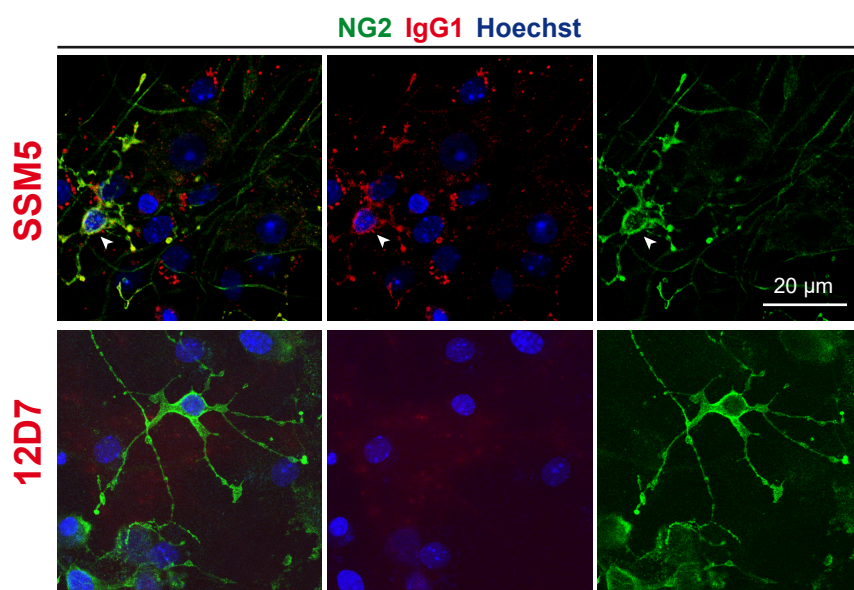

Figure S2. Immunofluorescence analysis of the reactivity of SSM5 in NG2-positive cells. Immunocytochemical localization of SSM5 (red) on cells stained for NG2 (green). Nuclei were counterstained with Hoechst 33258 (blue). Scale bar: 20 μm.

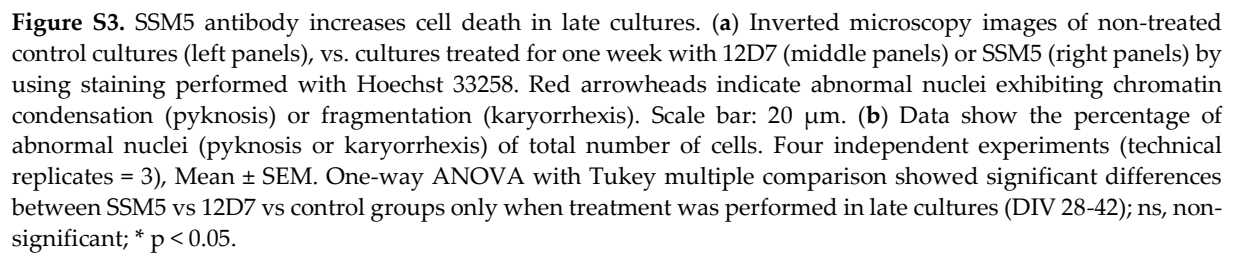

Supplement: s1 [file s1]
